# Supplementary material for: Interactions of newly designed dicationic carbazole derivatives with double-stranded DNA: syntheses, binding studies and AFM imaging
Source: Royal Society of Chemistry journal article supplement (doi:10.1039/c3ob40799c), 2013-01-01
Supplement: c3ob40799c.pdf [file c3ob40799c.pdf]

## Supplementary Information

### Interactions of Newly designed Dicationic carbazole derivatives with Double-Stranded DNA: Syntheses, Binding Studies and AFM imaging

Tao Jia <sup>[a],\*</sup>, Jin Xiang <sup>[a]</sup>, Jing Wang <sup>[b]</sup>, Peng Guo <sup>[a]</sup>, Junping Yu <sup>[b],\*</sup>

[a] Dr. T. Jia, Dr. J. Xiang, Prof. P. Guo School of Pharmaceutical Sciences, Wuhan University, Wuhan, Hubei  
430072, PR China Fax: +86-27-68759850, E-mail: [jiat@whu.edu.cn](mailto:jiat@whu.edu.cn) (Tao Jia)

[b] J. Wang, Dr. J. Yu State Key Laboratory of Virology, Wuhan Institute of Virology, Chinese Academy of  
Sciences, Wuhan, Hubei 430071, PR China Fax:+86-27-87199492, Email [yujp@wh.iov.cn](mailto:yujp@wh.iov.cn) (Junping Yu)

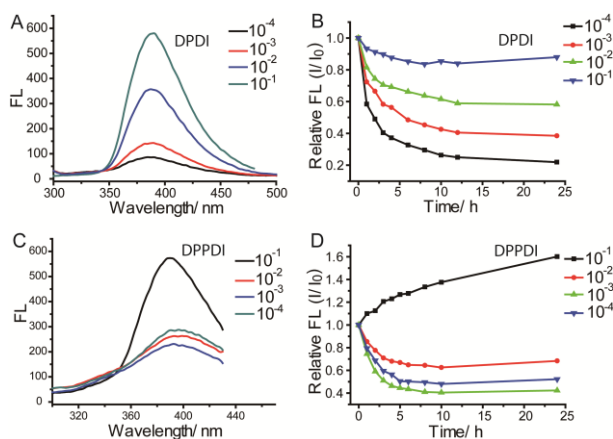

Fig.S1 Fluorescence spectra of DPDI (A) and DPPDI (C) in aqueous solutions with four different ionic strengths. Fluorescence intensity of maximum emissions changes over time for DPDI (B) and DPPDI (D). [dicationic carbazoles] = 0.1  $\mu$ M. The different ionic strengths of  $10^{-4}$  M,  $10^{-3}$  M,  $10^{-2}$  M,  $10^{-1}$  M were adjusted by NaCl.

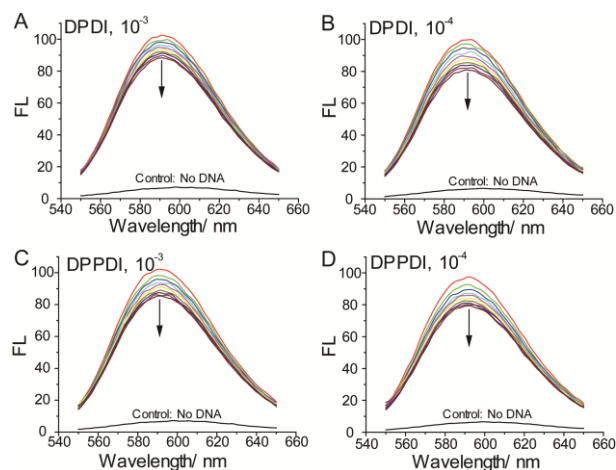

Fig. S2. Fluorescence spectra of EB (2  $\mu$ M) and DNA (5  $\mu$ M) with the increase of DPDI ((A) ionic strength of  $10^{-3}$  M and (B) ionic strength of  $10^{-4}$  M) and DPPDI ((C) ionic strength of  $10^{-3}$  M and (D) ionic strength of  $10^{-4}$  M). [DPDI] or [DPPDI] = 0, 3.33, 6.67, 10.00, 13.33, 16.67, 20.00, 23.33, 26.67, 30.00  $\mu$ M.

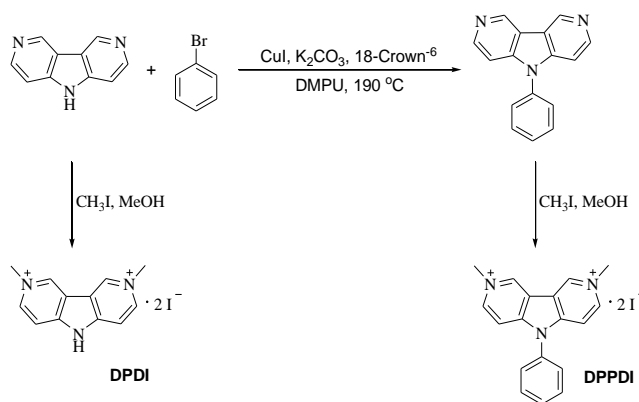

Fig.S3. Synthesis of the two dicationic carbazoles

## Spectroscopic data about three synthetic compounds

### 1. 5-phenyl-5H-pyrrolo[3,2-c:4,5-c']dipyridine (Fig. S4-6)

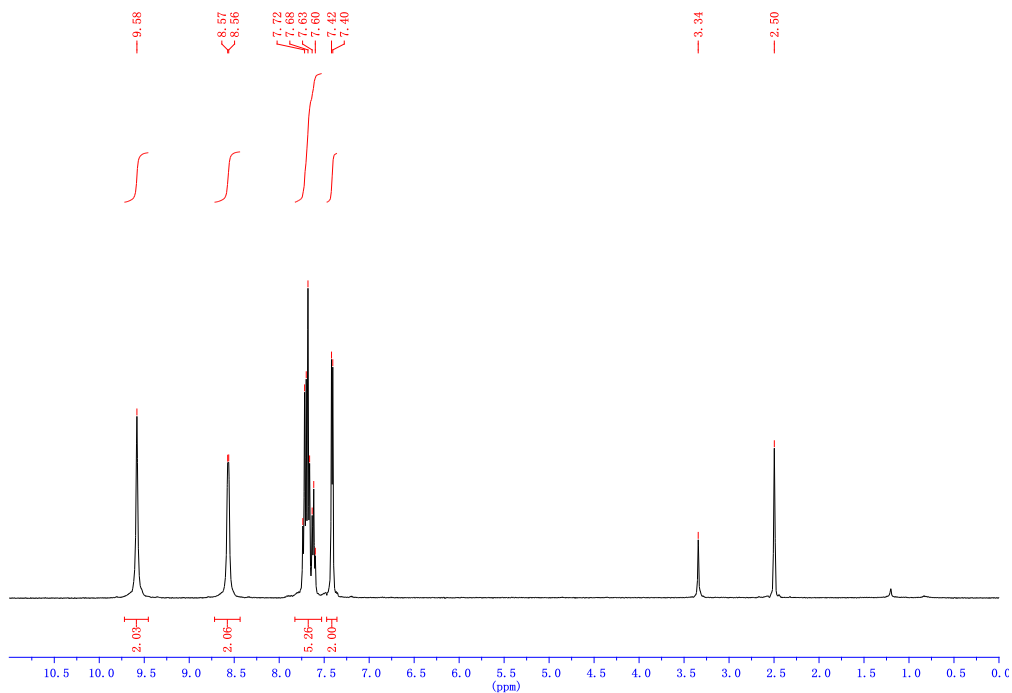

Fig. S4. <sup>1</sup>H NMR of 5-phenyl-5H-pyrrolo[3,2-c:4,5-c']dipyridine

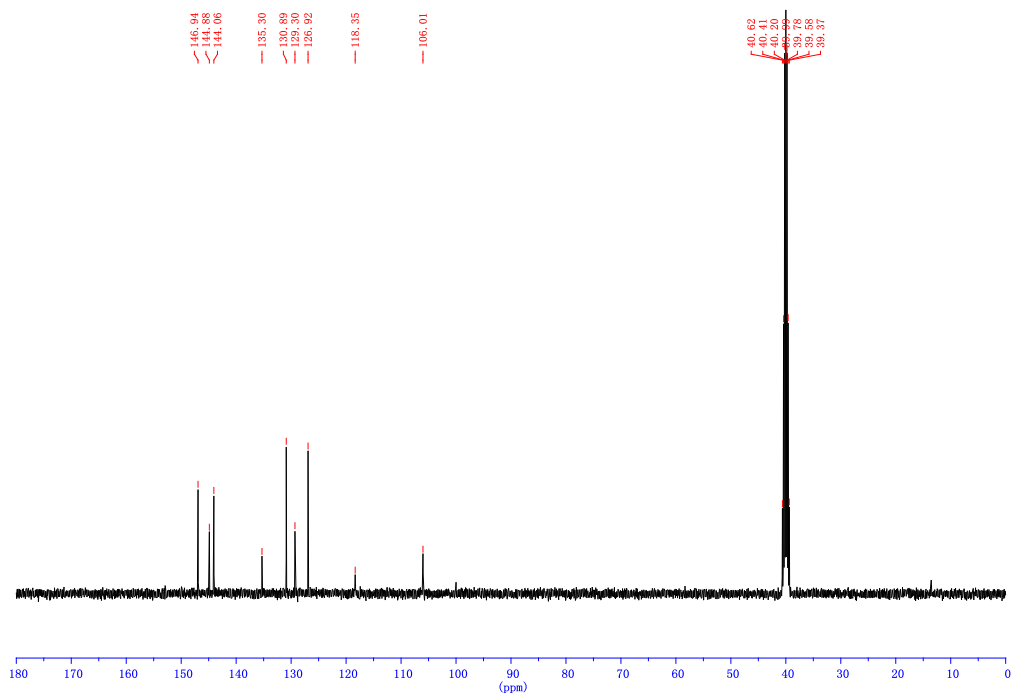

Fig. S5. <sup>13</sup>C NMR of 5-phenyl-5H-pyrrolo[3,2-c:4,5-c']dipyridine

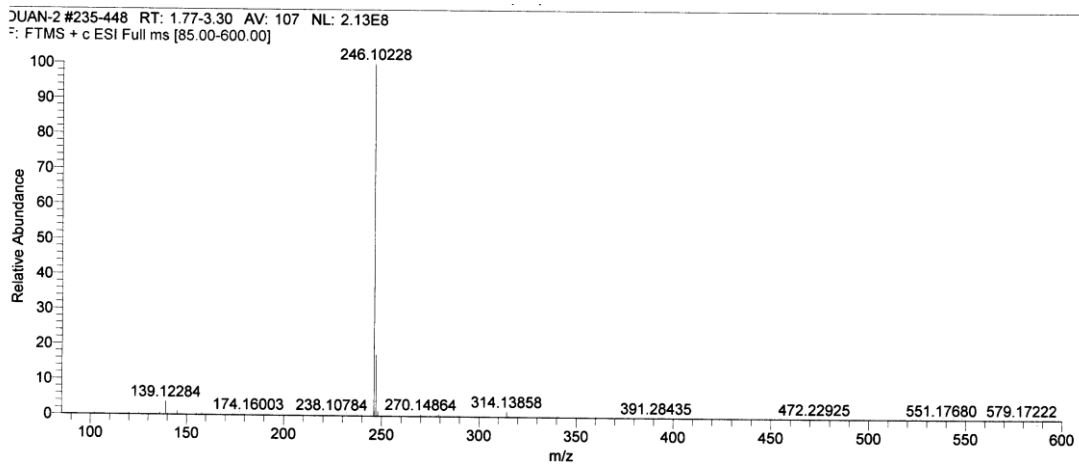

Fig. S6. HRMS of 5-phenyl-5H-pyrrolo[3,2-c:4,5-c']dipyridine

2. 2,8-Dimethyl-5H-pyrrolo[3,2-c:4,5-c']dipyridinium diiodide (DPDI) (Fig. S7-10)

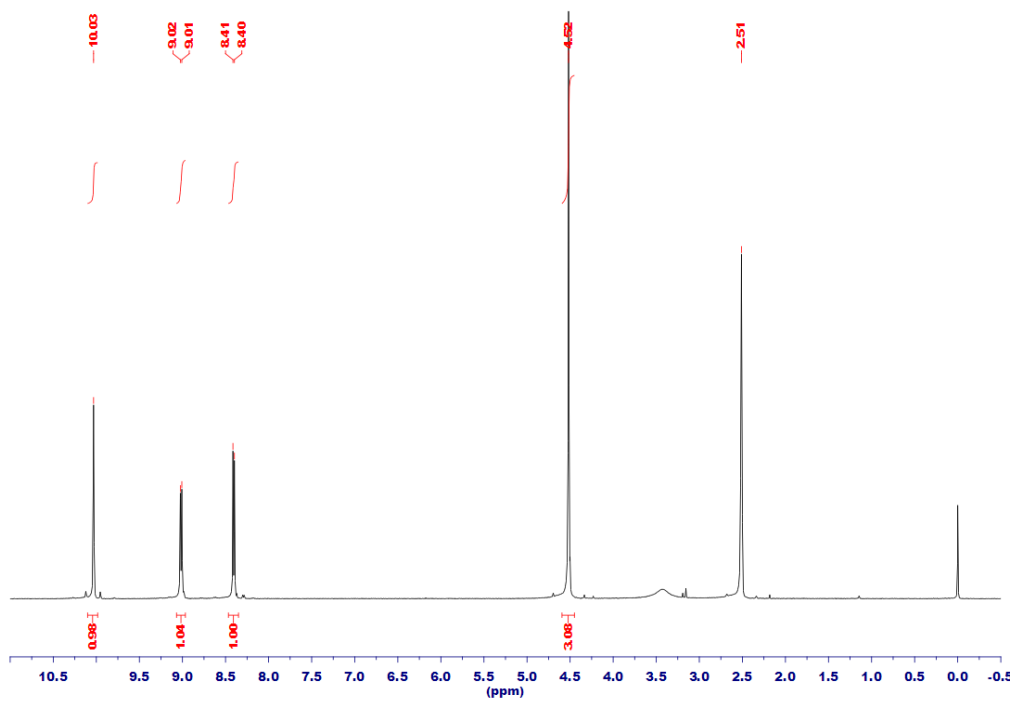

Fig. S7.  $^1\text{H}$  NMR of DPDI

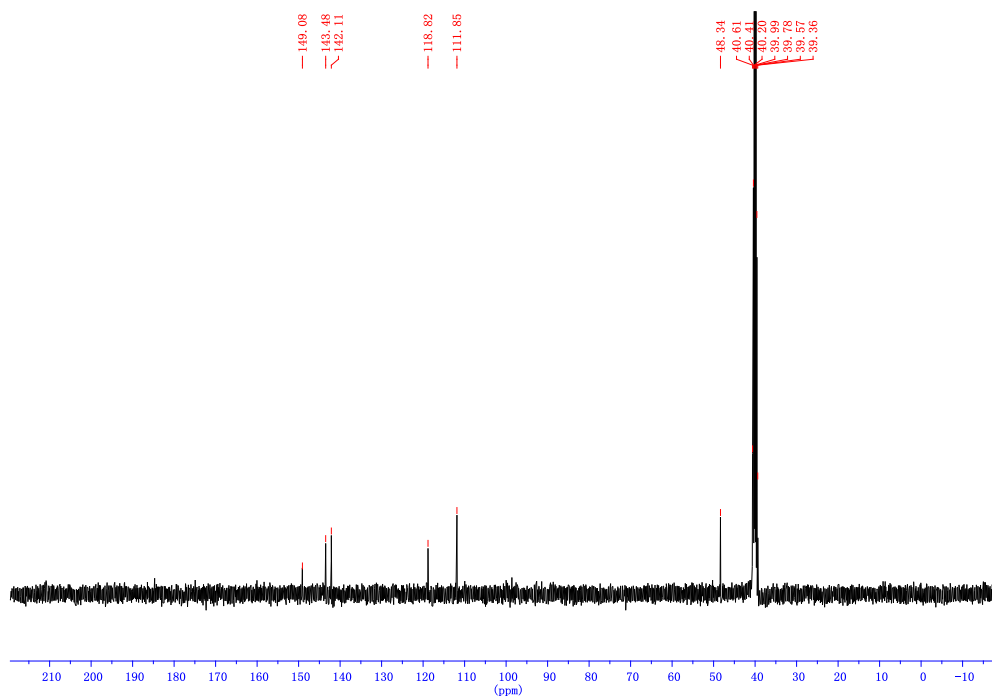

Fig. S8.  $^{13}\text{C}$  NMR of DPDI

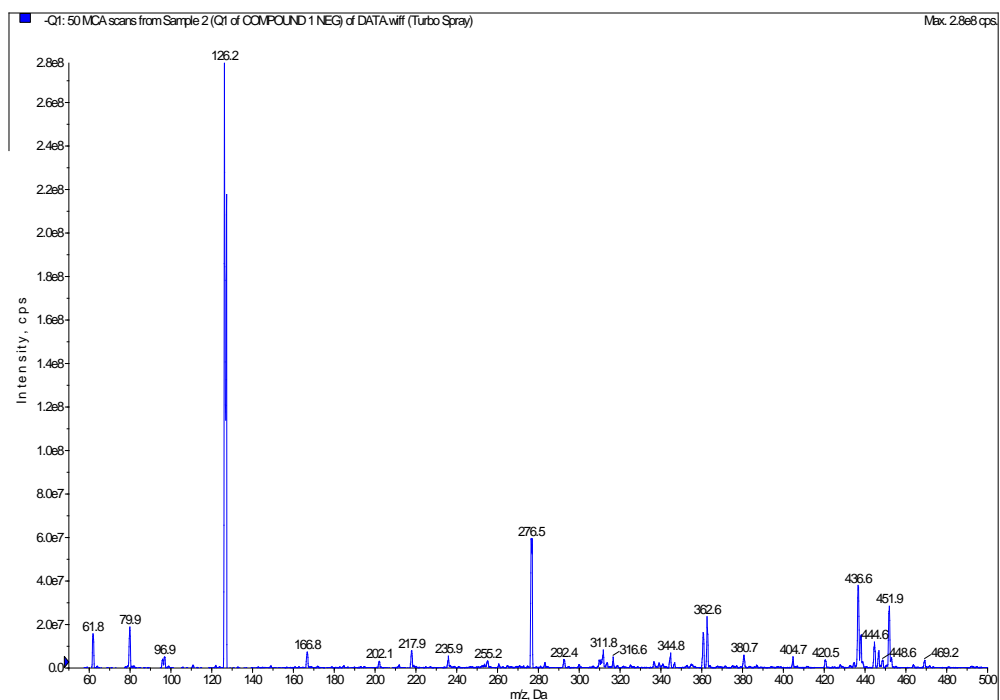

Fig. S9. MS of DPDI

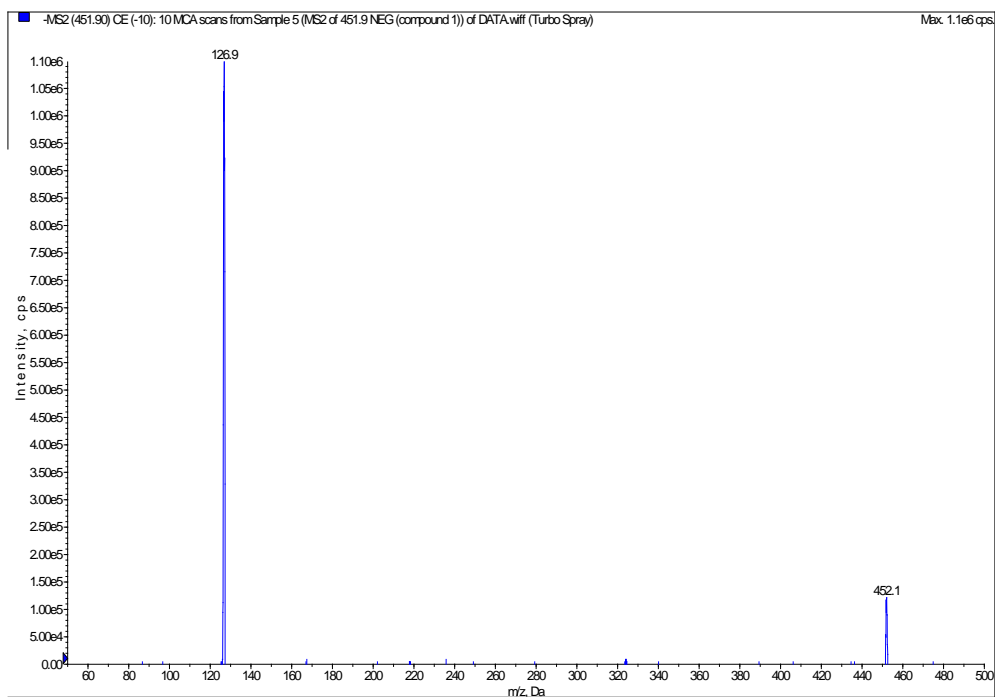

Fig. S10. MS2 of 451.9

3. 2,8-Dimethyl-5-phenyl-5H-pyrrolo[3,2-c:4,5-c']dipyridinium diiodide (DPDI) (Fig. S11-13)

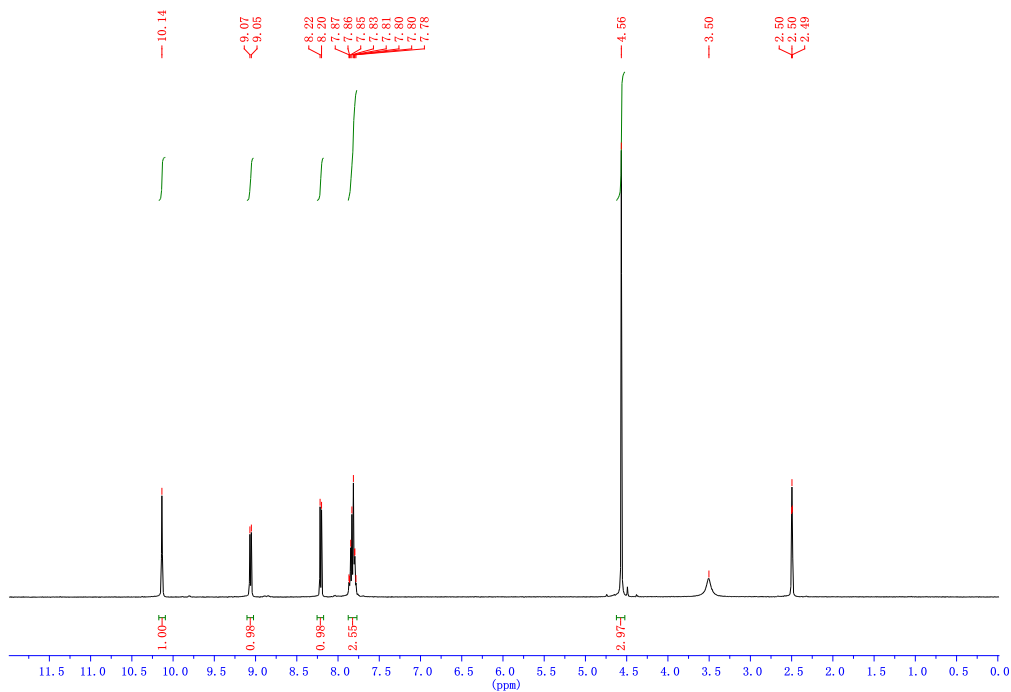

Fig. S11. <sup>1</sup>H NMR of DPDI

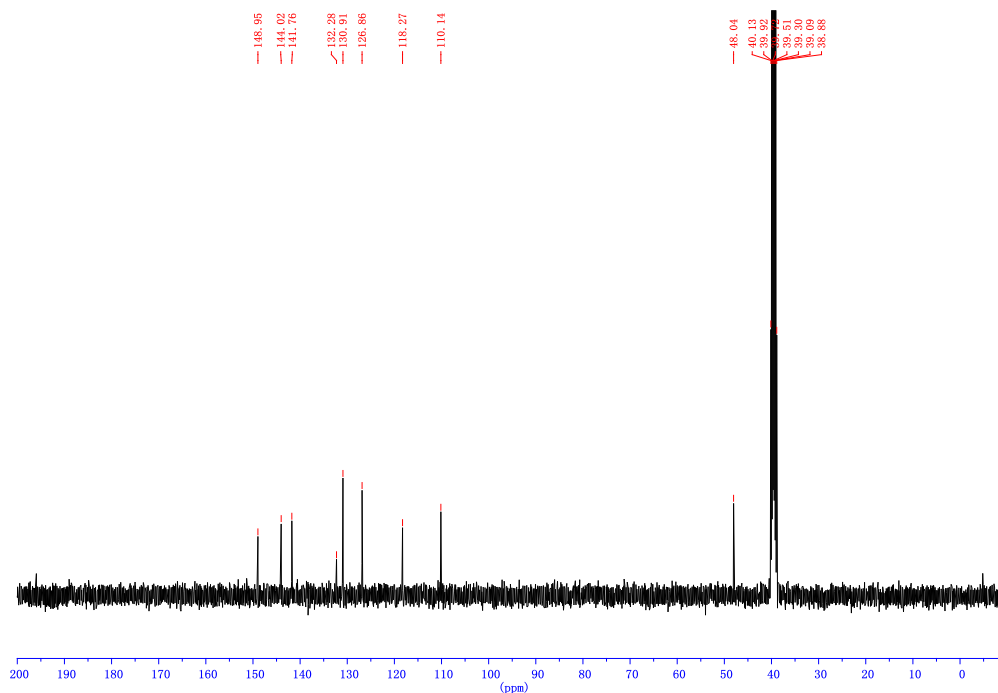

Fig. S12. <sup>13</sup>C NMR of DPPDI

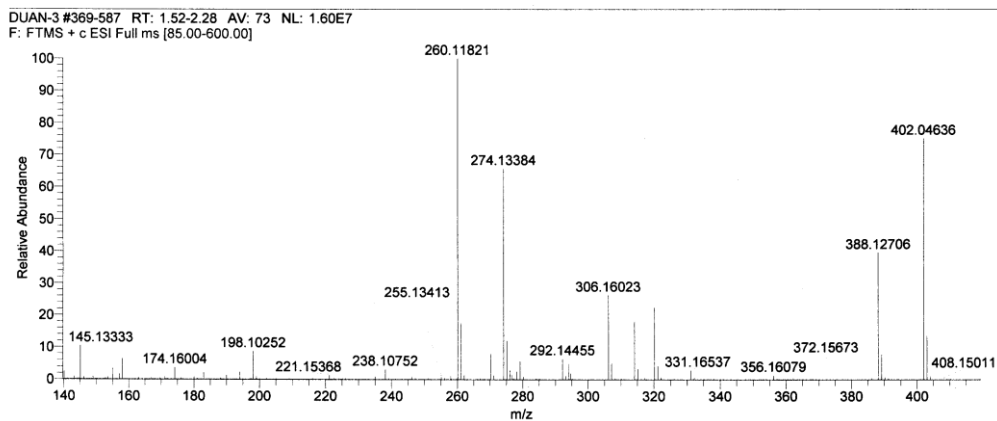

Fig. S13. HRMS of DPPDI
